# Supplementary material for: Electrospun cobalt-ZIF micro-fibers for efficient water oxidation under unique pH conditions
Source: Royal Society of Chemistry journal article supplement (doi:10.1039/c8cy02620c), 2019-01-01
Supplement: c8cy02620c1.pdf [file c8cy02620c1.pdf]

## Electrospun Cobalt-ZIF Micro-Fibers for Efficient Water Oxidation at Unique pH Conditions

**S. Sam Sankar,<sup>†‡</sup> Sivasankara Rao Ede,<sup>†‡</sup> S. Anantharaj,<sup>†‡</sup> K. Karthick,<sup>†‡</sup> K. Sangeetha<sup>†‡</sup> and Subrata Kundu<sup>†‡\*</sup>**

<sup>†</sup>Academy of Scientific and Innovative Research (AcSIR), CSIR-Central Electrochemical Research Institute (CSIR-CECRI) Campus, New Delhi, India.

<sup>‡</sup>CSIR-Central Electrochemical Research Institute (CECRI), Karaikudi-630003, Tamil Nadu, India.

\* To whom correspondence should be addressed, *E-mail:* [skundu@cecri.res.in](mailto:skundu@cecri.res.in); [kundu.subrata@gmail.com](mailto:kundu.subrata@gmail.com), Phone/Fax: (+ 91) 4565-241487.

This file contains 25 pages where the information on the reagents and instruments used, schematic representations, XRD, SEM, XPS and electrochemical studies are given respectively.

## Reagents and Instruments

Cobalt chloride hexahydrate ( $\text{CoCl}_2 \cdot 6\text{H}_2\text{O}$ ) and polyacrylonitrile (PAN) were procured from sigma-aldrich. 1-methylbenzimidazole and dimethylformamide (DMF) were purchased from Alfa-aesar. For electrospinning, ESPIN from PECO was used. The electrochemical analyzer AUT-302N.FRA32M was used for all electrochemical characterizations. Hg/HgO reference electrode, Hg/HgSO<sub>4</sub> reference electrode and Pt counter electrode were purchased from CH instruments and CC working electrode purchased from Alfa-Aesar. DI water is used during the course of synthetic process. The Co-ZIF microfibers prepared at different conditions were characterized with the FE-SEM instrument (SUPRA 55VP Carl Zeiss) with a separate EDS detector connected to that instrument. Color mapping and Energy Dispersive X-ray Spectroscopy (EDS) analysis were done with the aid of FESEM instrument. The XRD analysis was done with a scanning rate of  $5^\circ \text{ min}^{-1}$  in the  $2\theta$  range  $10\text{-}90^\circ$  using a Bruker X-ray powder diffractometer (XRD) with Cu K <sub>$\alpha$</sub>  radiation ( $\lambda = 0.154 \text{ nm}$ ). X-ray photoelectron spectroscopic (XPS) analysis was performed using a Theta Probe AR-XPS system (Thermo Fisher Scientific, UK). Electrochemical analyzerAUT-302N.FRA32M was used for the entire OER and related studies.

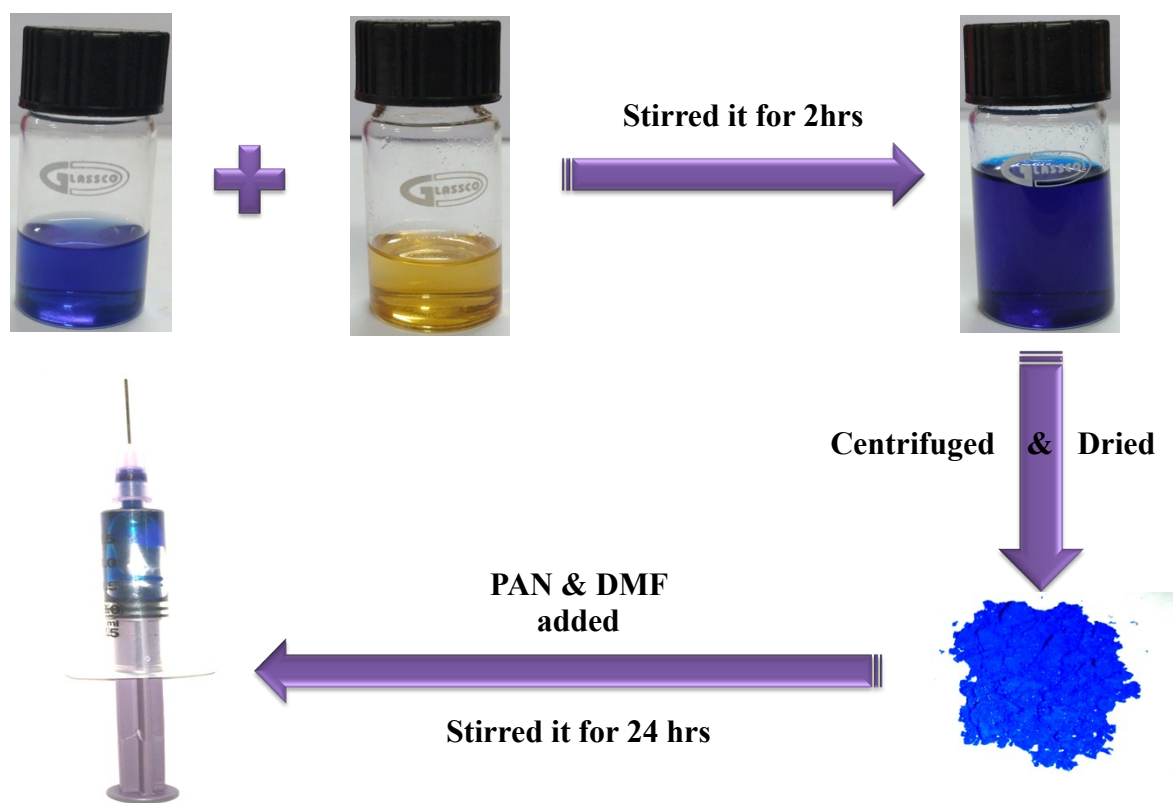

**Scheme S1.** Synthesis procedure of Co-ZIF and precursor material for Electrospinning.

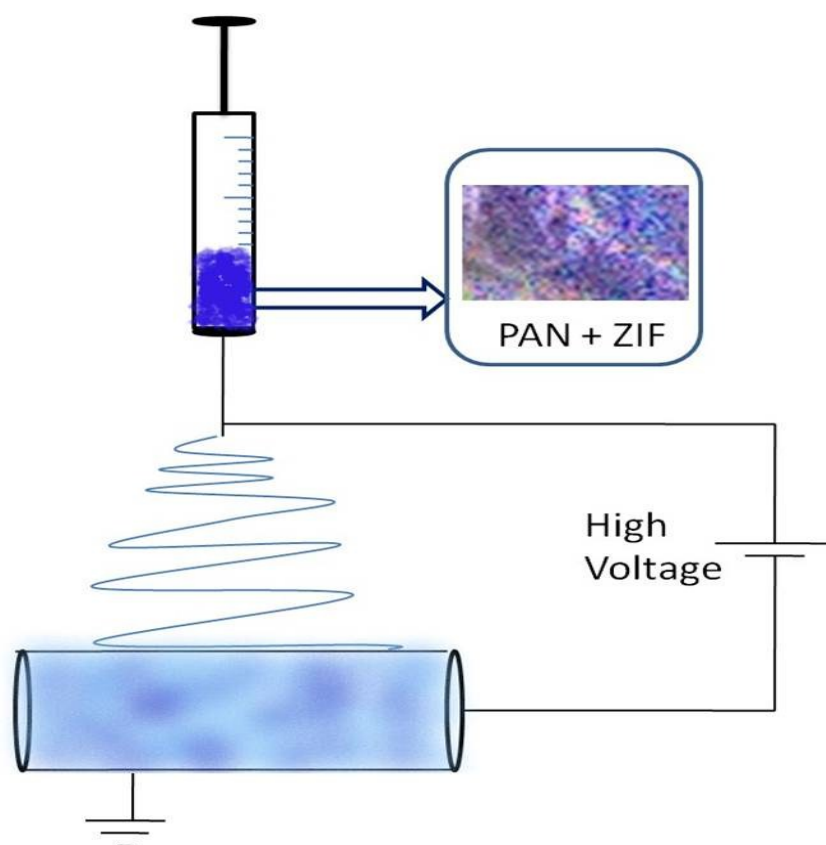

**Scheme S2:** Electrospinning method utilized for the formation of Co-ZIF microfibers.

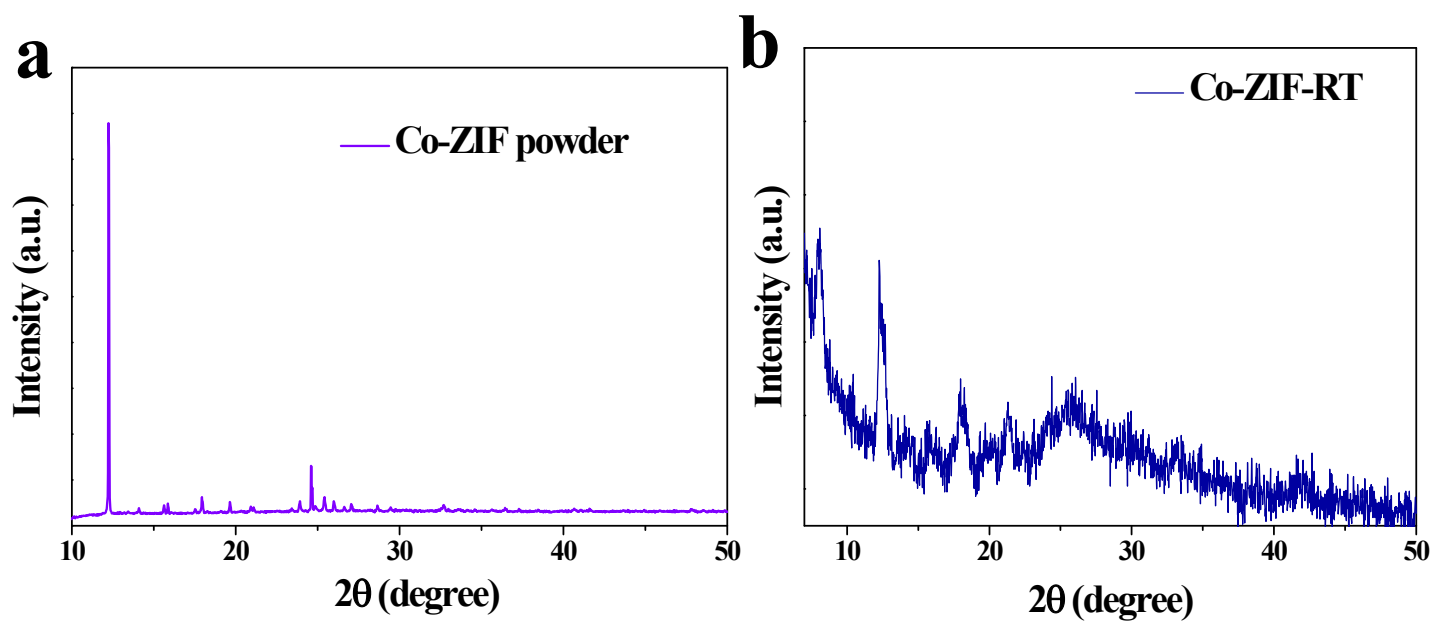

**Figure S1:** a) is the XRD pattern of Co-ZIF powder and b) is the XRD pattern of microfibers of Co-ZIF-RT.

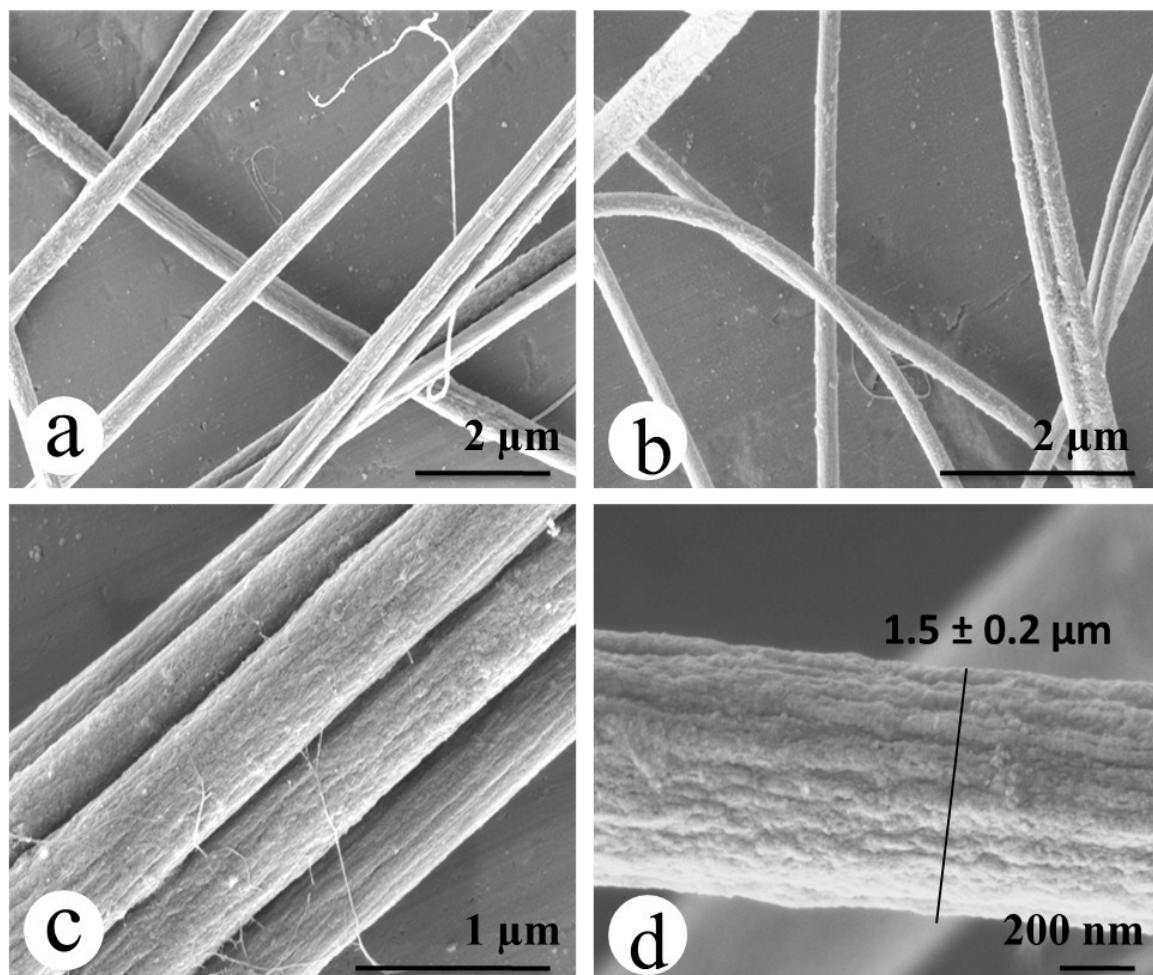

**Figure S2:** (a-d) are the FESEM images of Co-ZIF-RT at different magnifications that showed the exact fiber formation at room temperature.

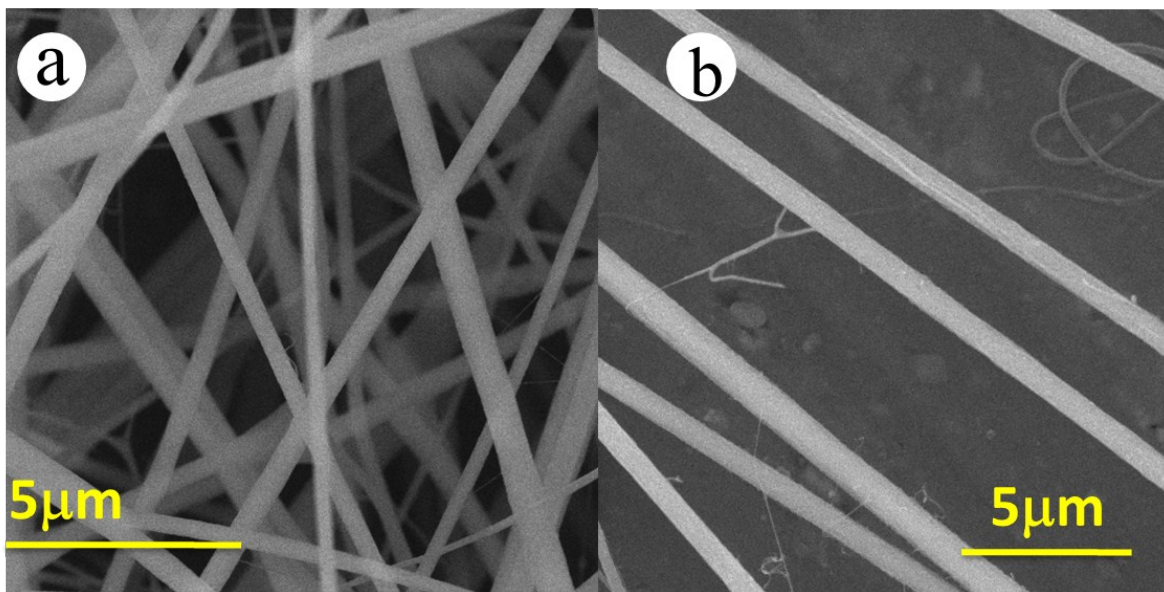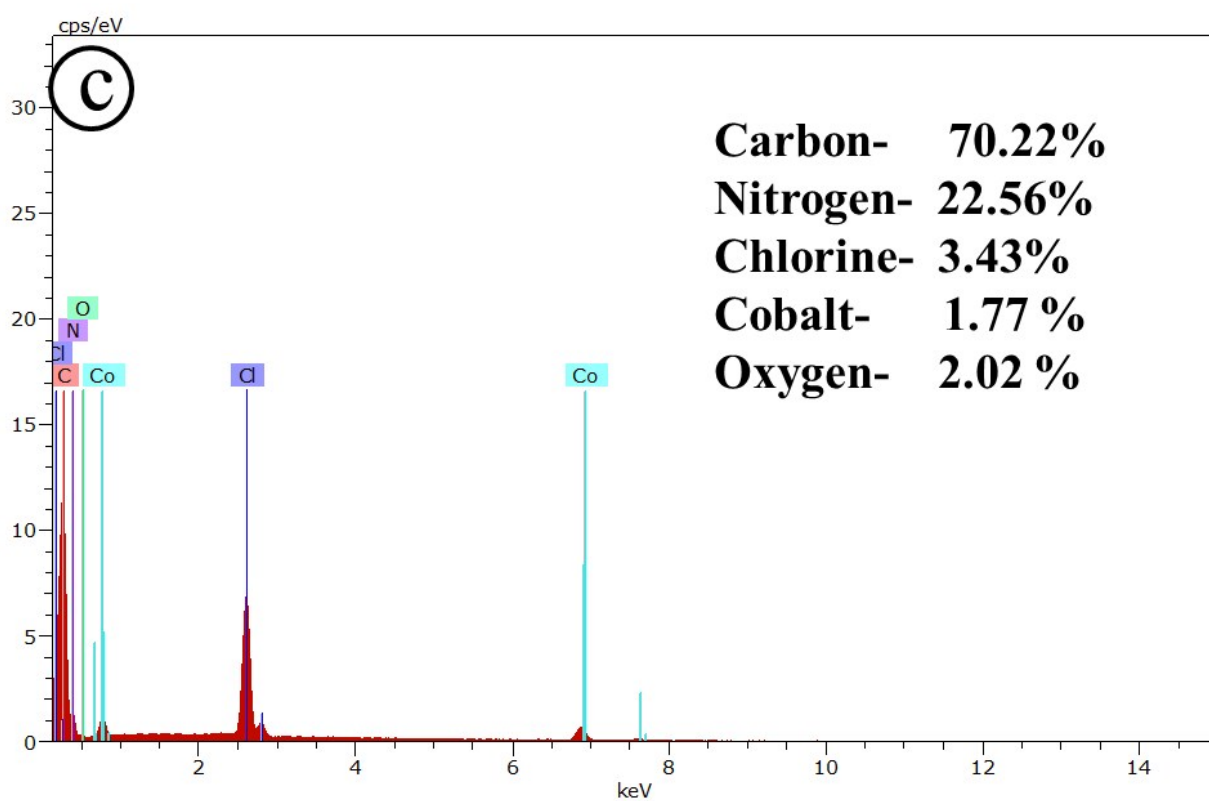

**Figure S3:** (a and b) are the SEM images of Co-ZIF-RT showing fiber morphology and (c) is the corresponding EDS spectrum.

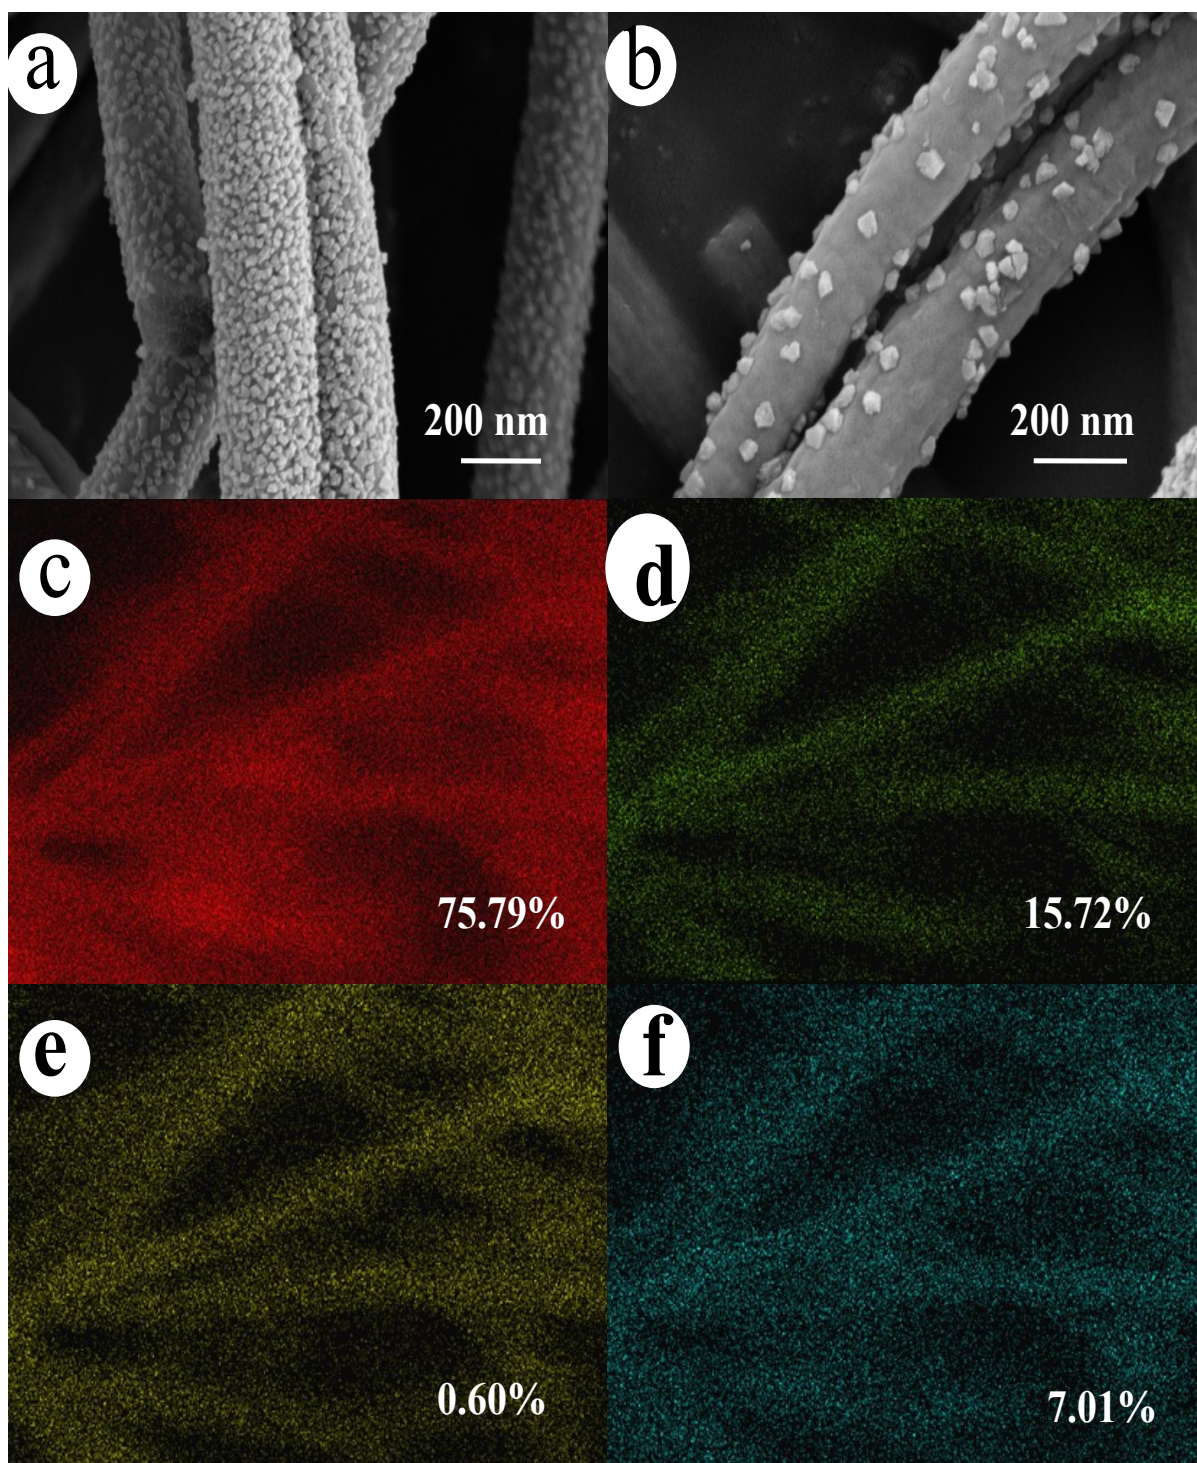

**Figure S4:** (a, b) are the FESEM images of Co-ZIF-350-N<sub>2</sub> (c-f) are corresponding mapping of C, N, Co, O respectively.



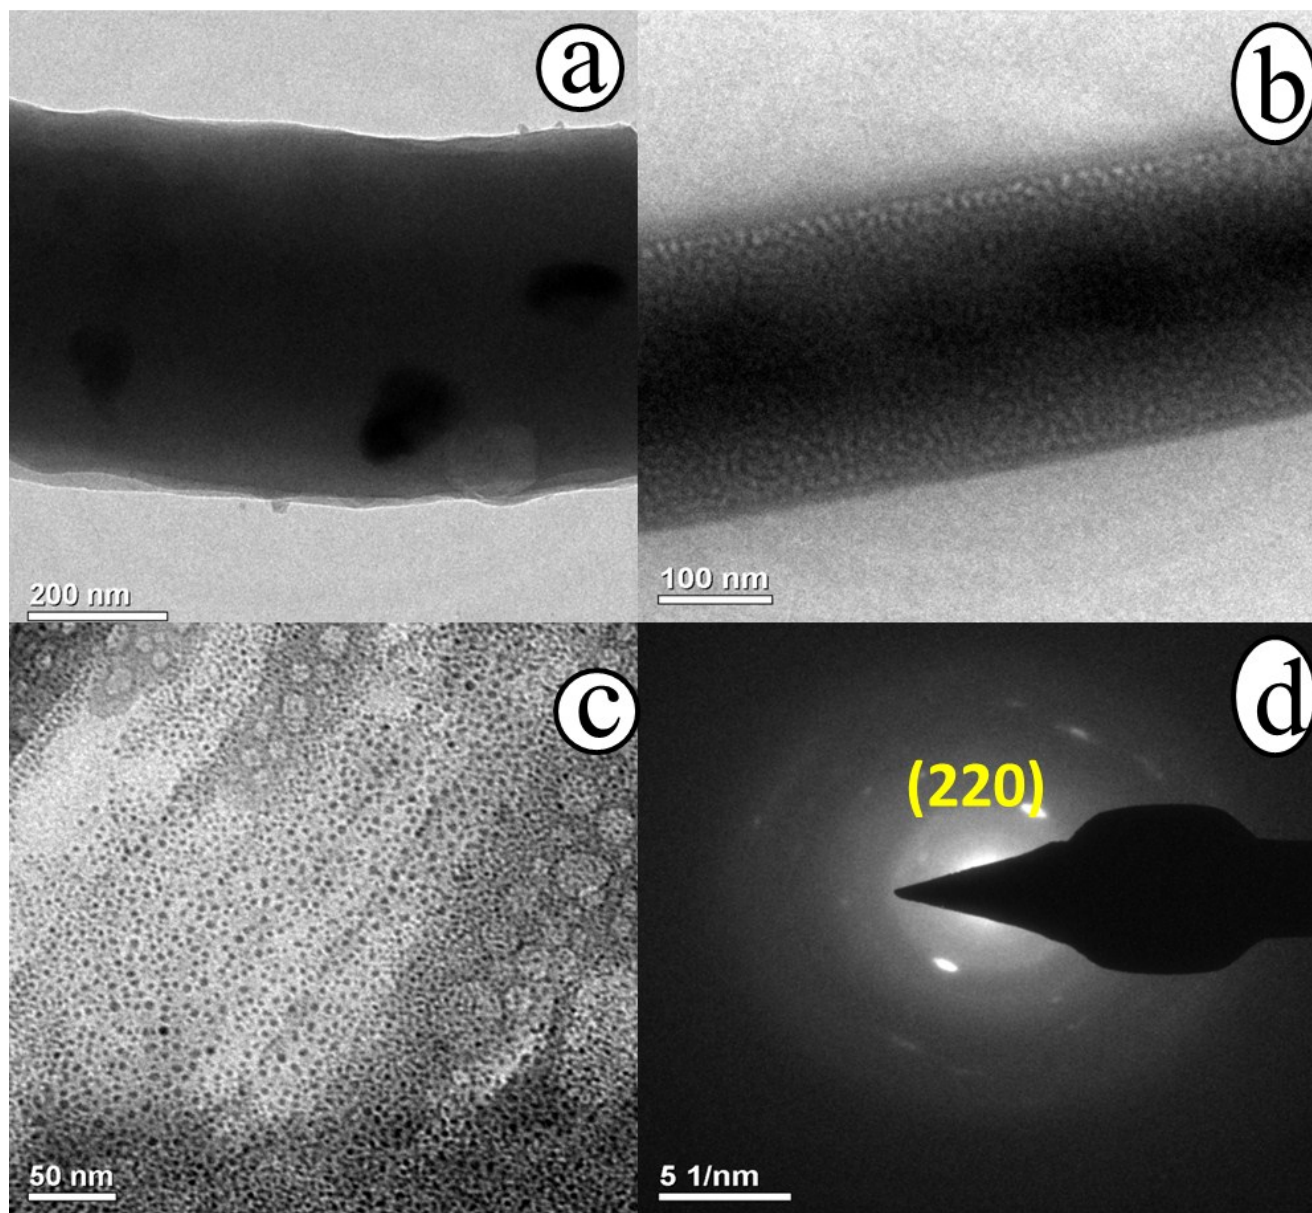

**Figure S5:** (a-c) are the TEM images of Co-ZIF-550-N<sub>2</sub> from the low to high magnification and (d) is the corresponding SAED pattern.

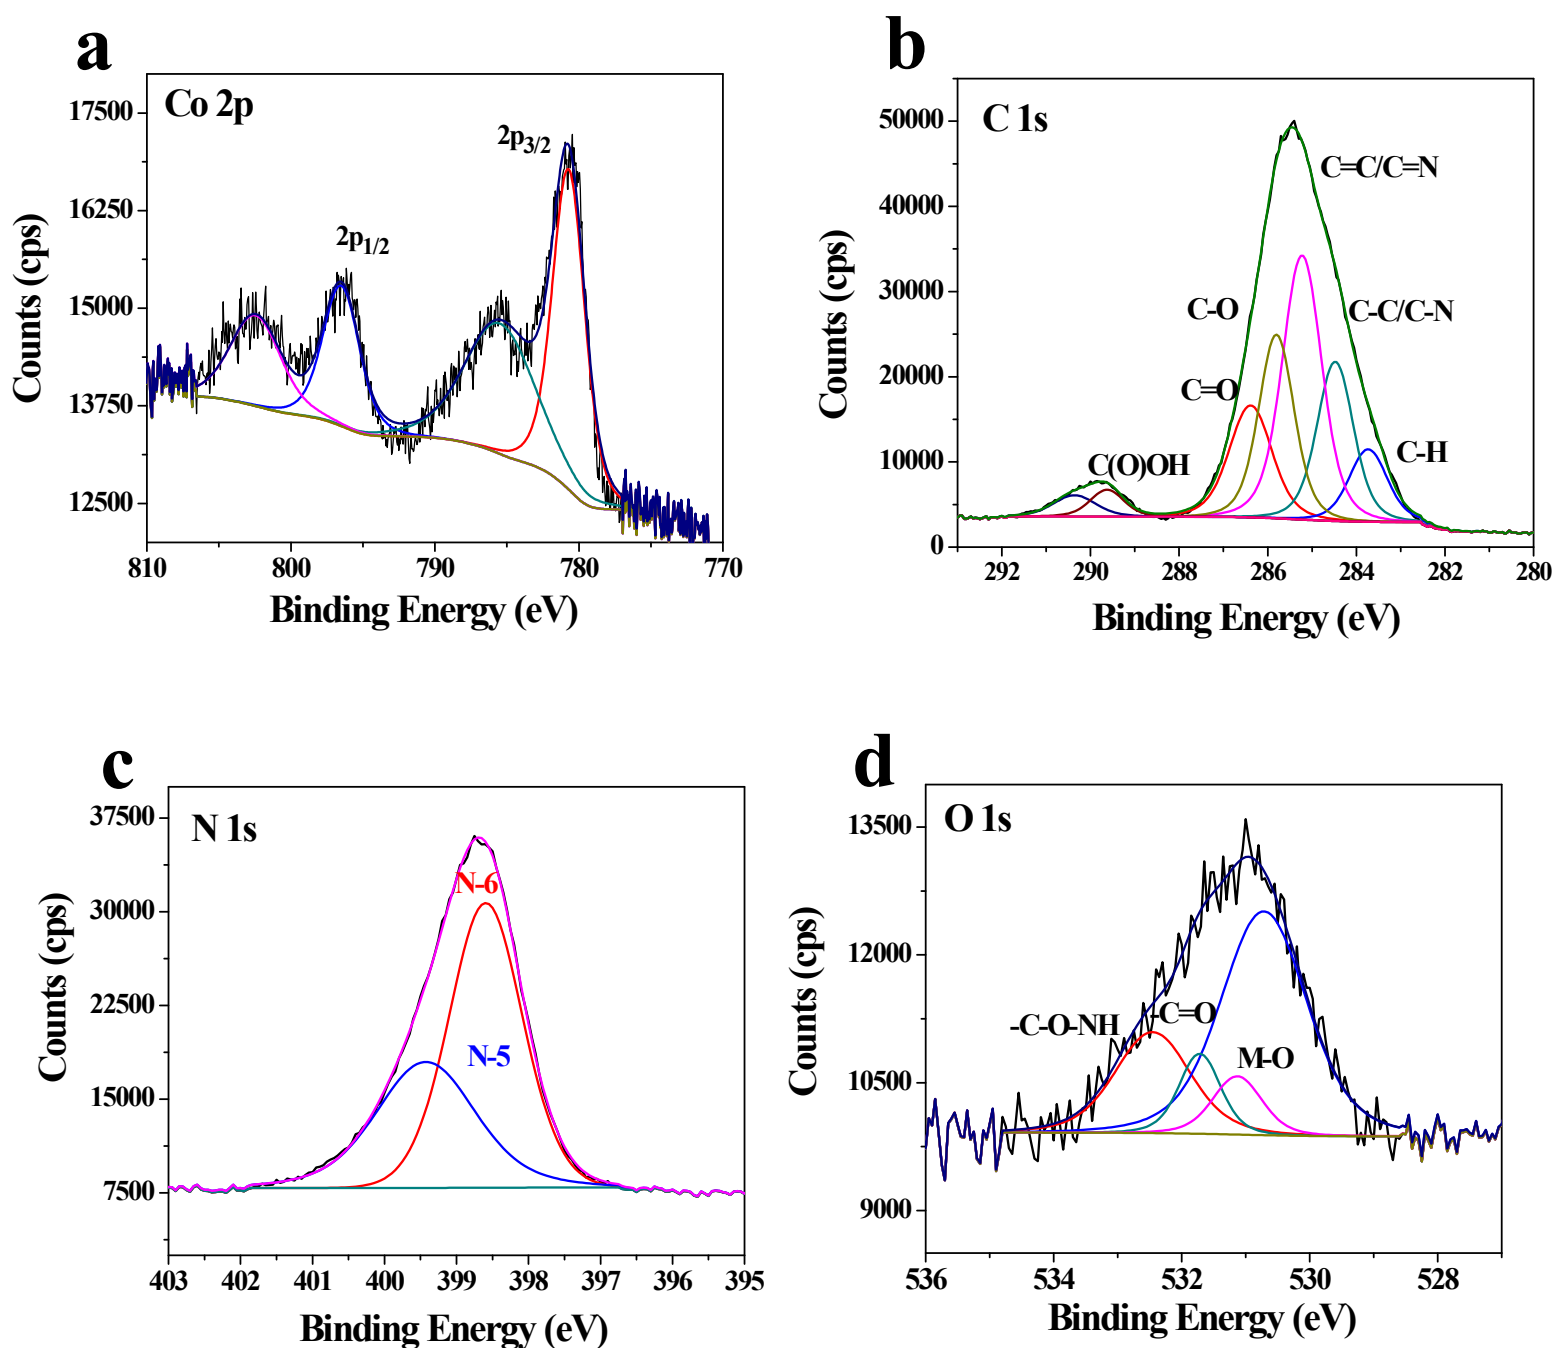

**Figure S6:** (a-d) are the XPS spectrum of corresponding elements of Co 2p, C 1s, N1s and O 1s in Co-ZIF-RT respectively.

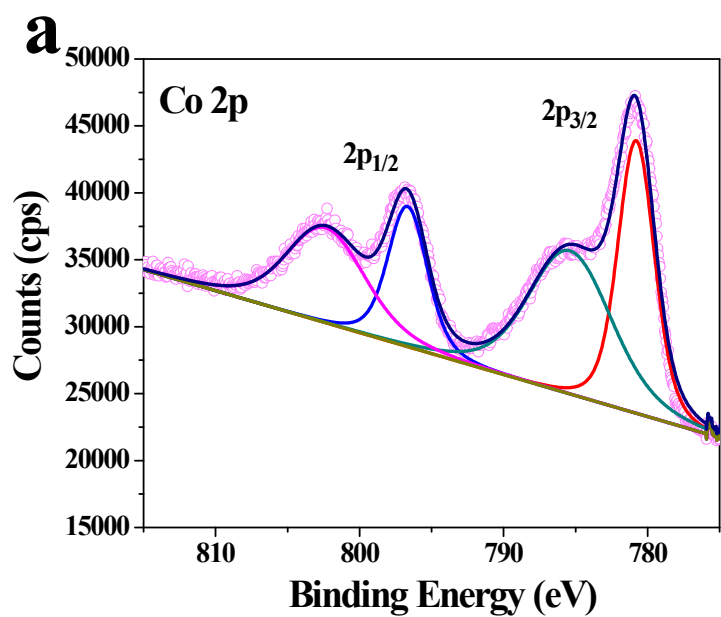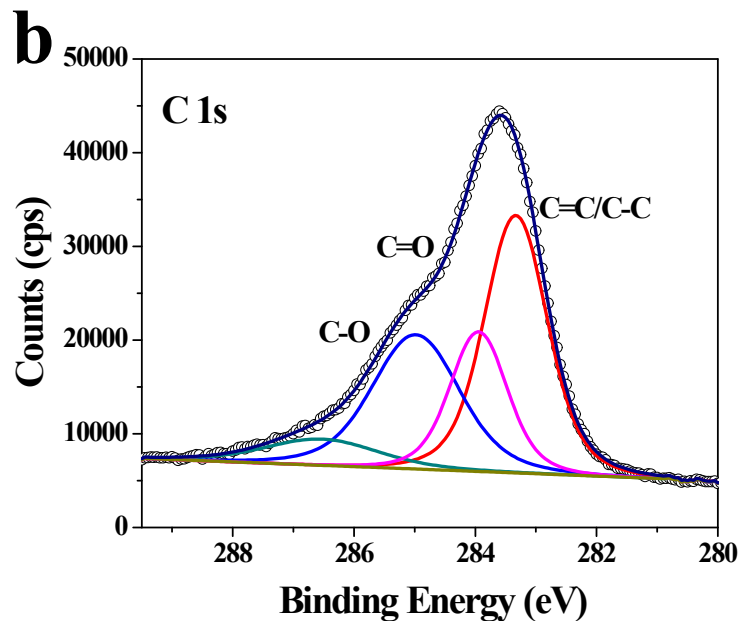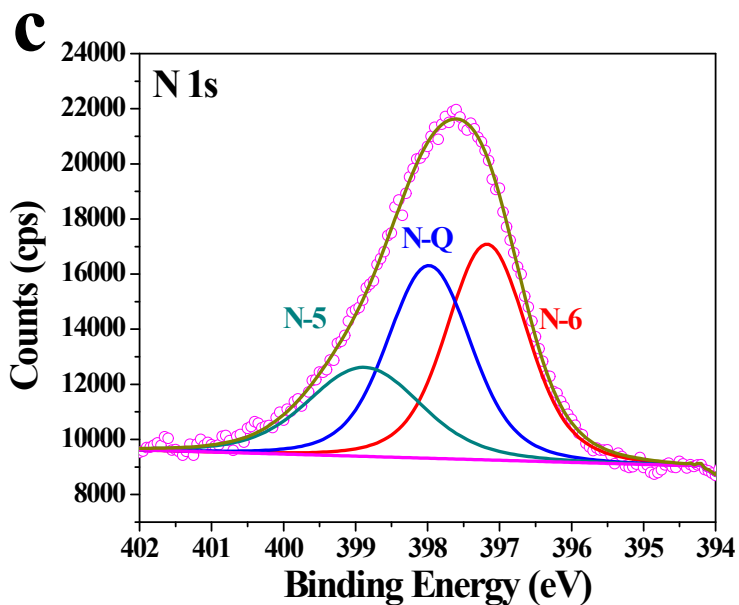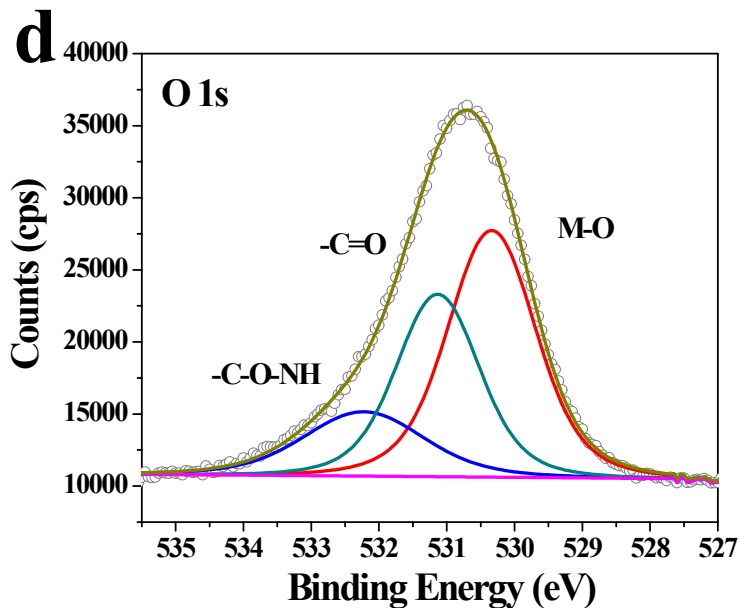

**Figure S7:** (a-d) are the XPS spectrum of corresponding elements of Co 2p, C 1s, N1s and O 1s in Co-ZIF-350-N<sub>2</sub> respectively.

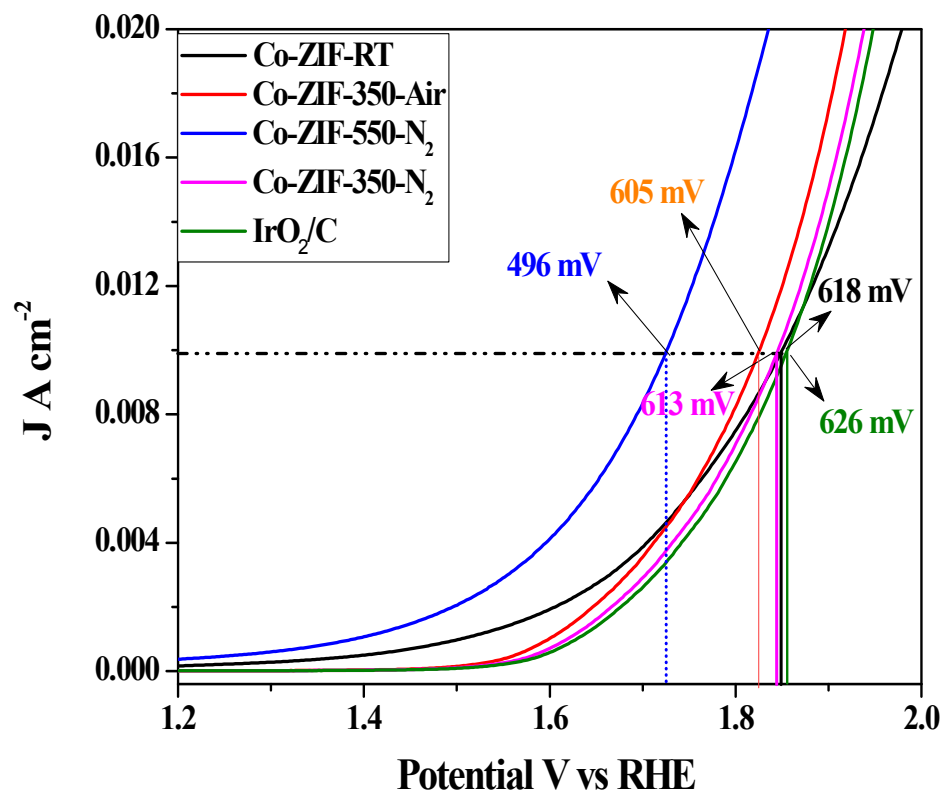

**Figure S8:** Polarization curves acquired in 0.5 M H<sub>2</sub>SO<sub>4</sub> without iR compensation.

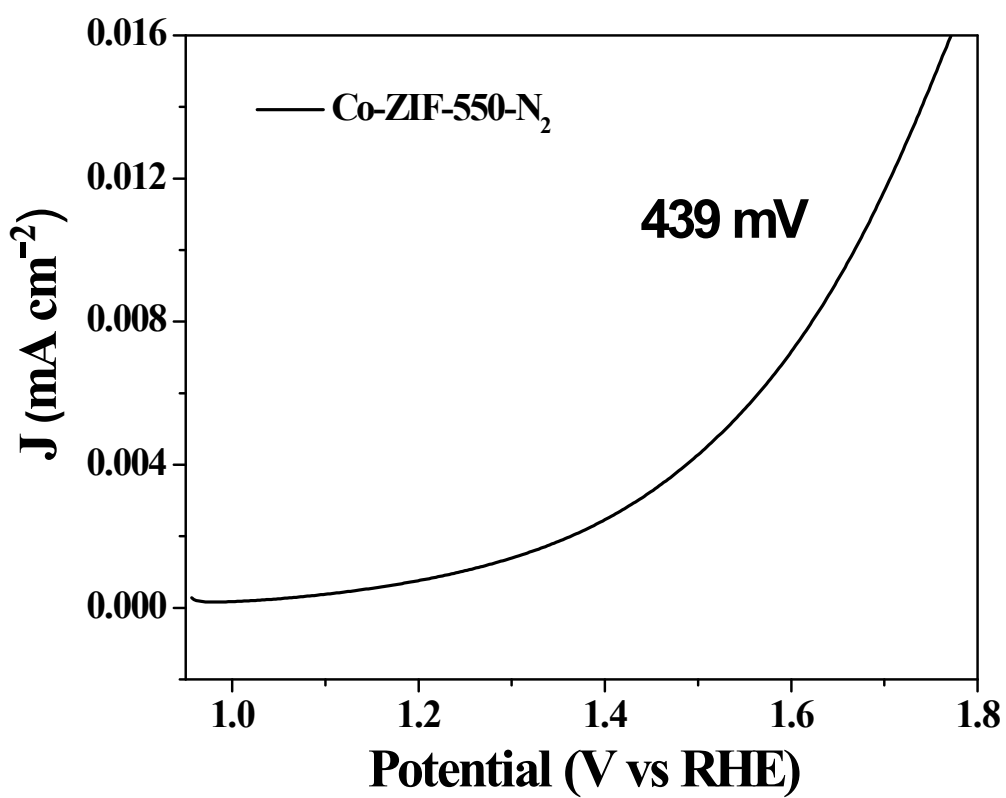

**Figure S9:** Polarization curve acquired at 1 mV/sec for Co-ZIF-550-N<sub>2</sub> after the cycling test for 250 cycles at 200 mV/sec.

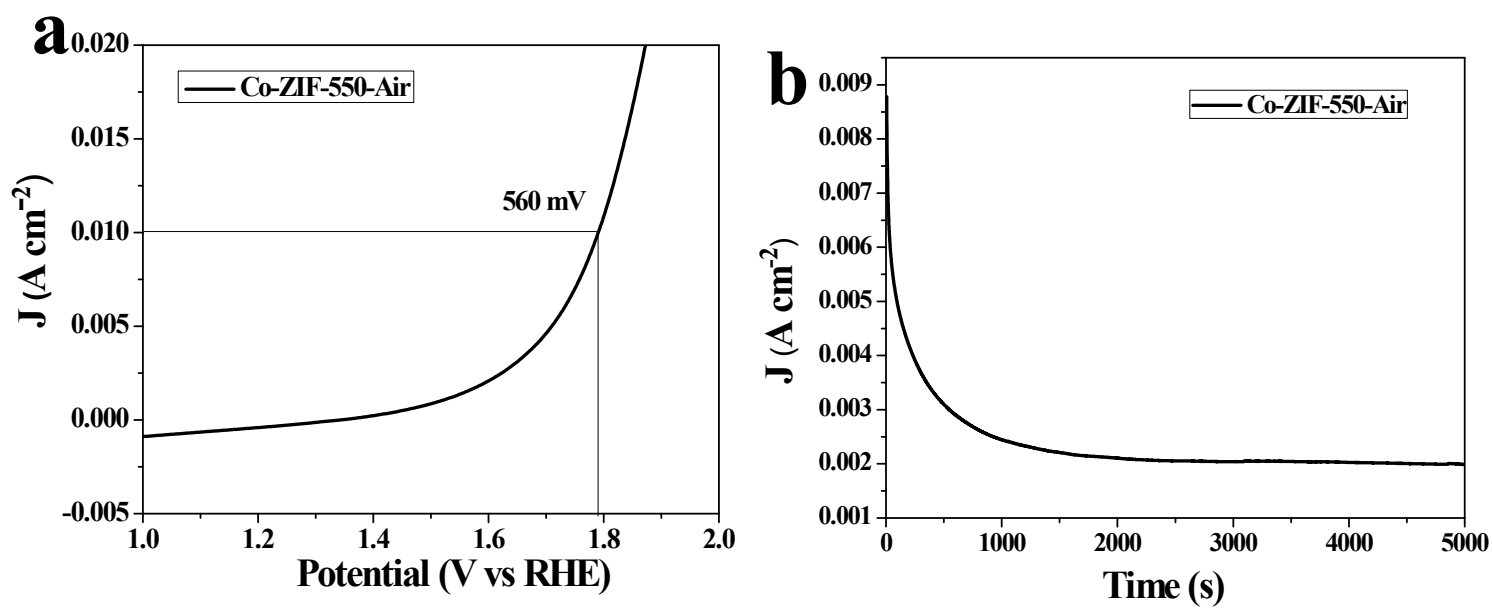

**Figure S10:** (a) is the polarization curve acquired at 1 mV/sec for Co-ZIF-550-Air and (b) is the corresponding chronoamperometry study.

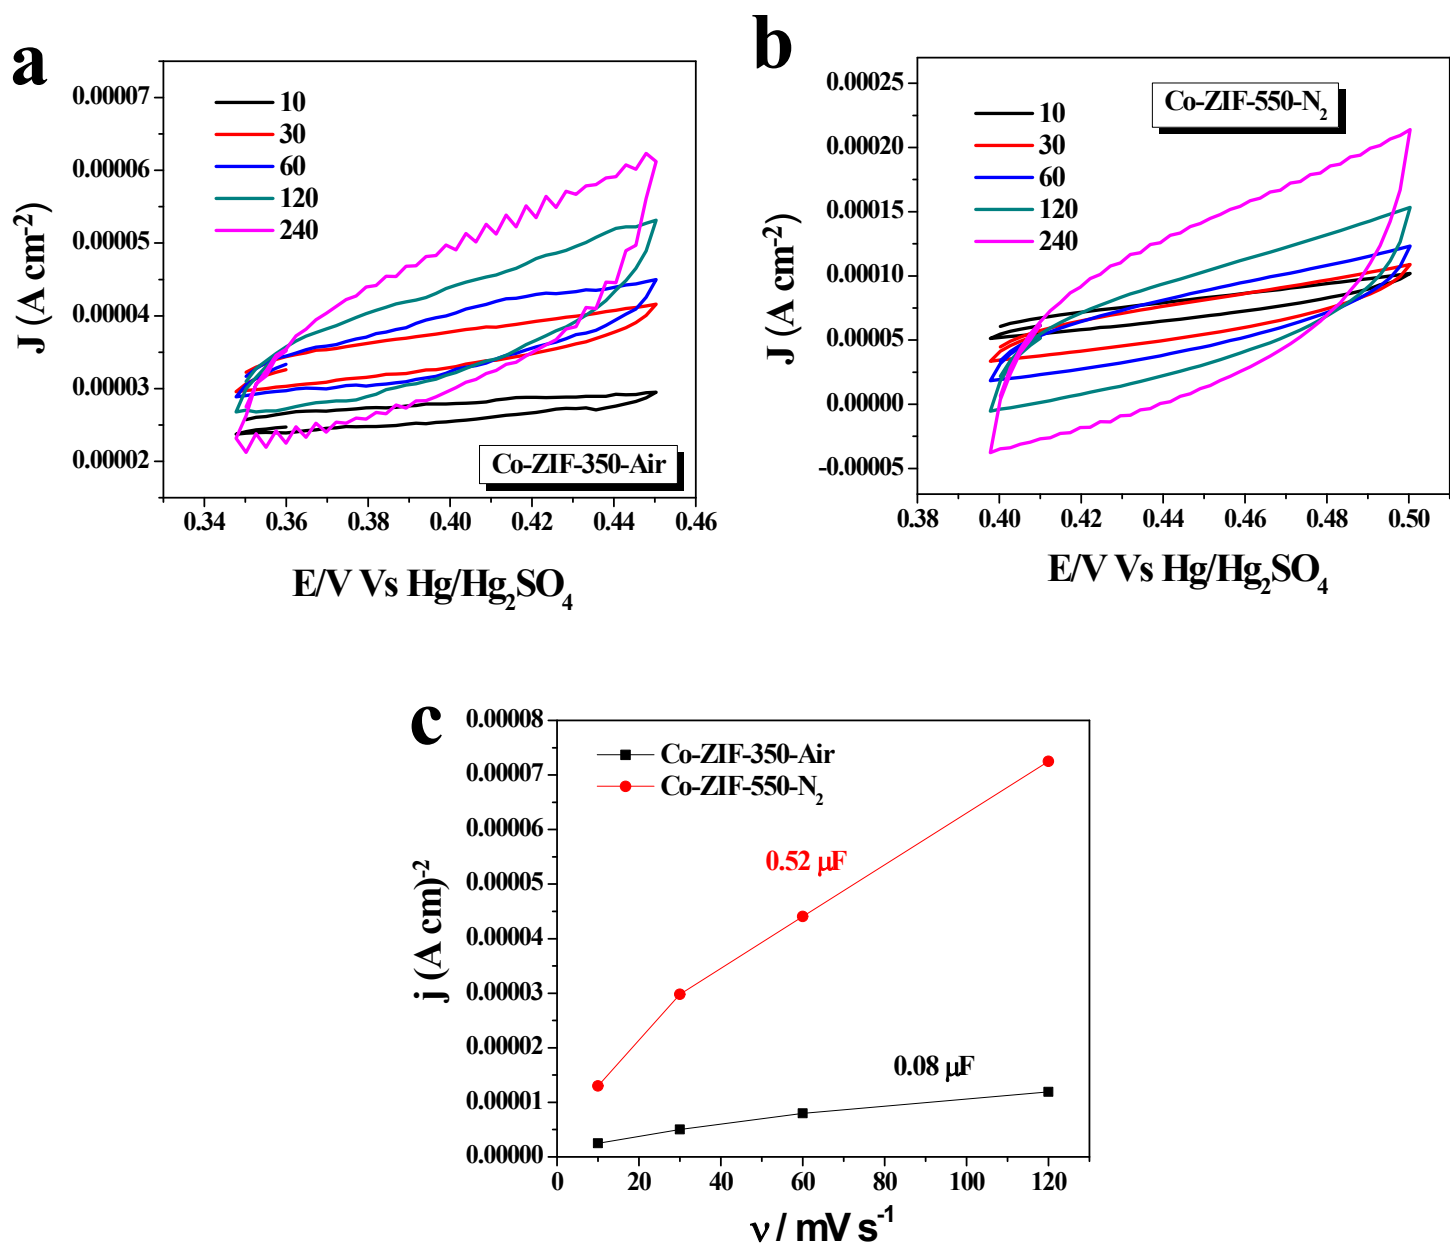

**Figure S11:** (a and b) are the observed CV at different scan rates like 10, 30, 60 and 120 mV /sec and (c) is the corresponding  $C_{dl}$  values at acid medium.

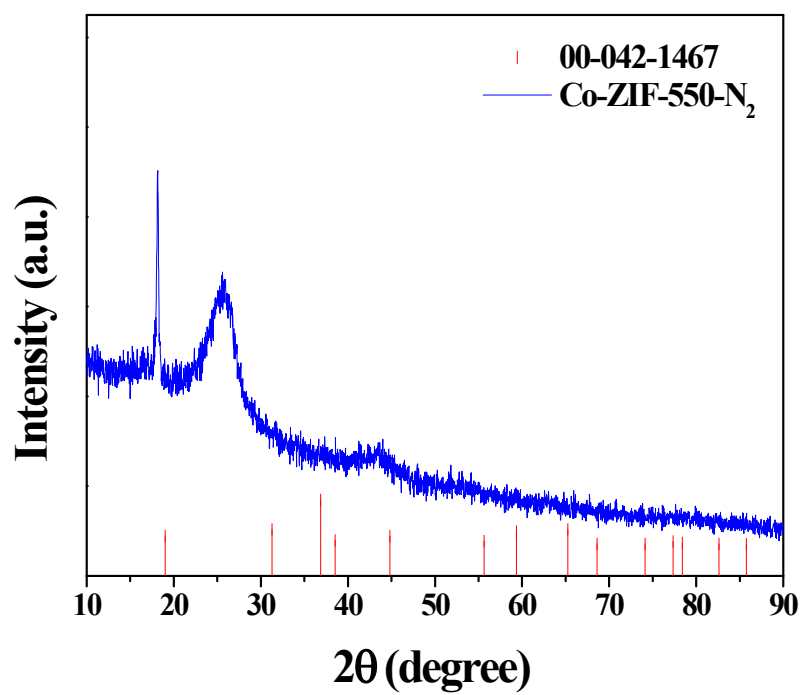

**Figure S12:** a) is the XRD pattern of Co-ZIF-550-N<sub>2</sub> observed after OER study in 0.5 M H<sub>2</sub>SO<sub>4</sub>.



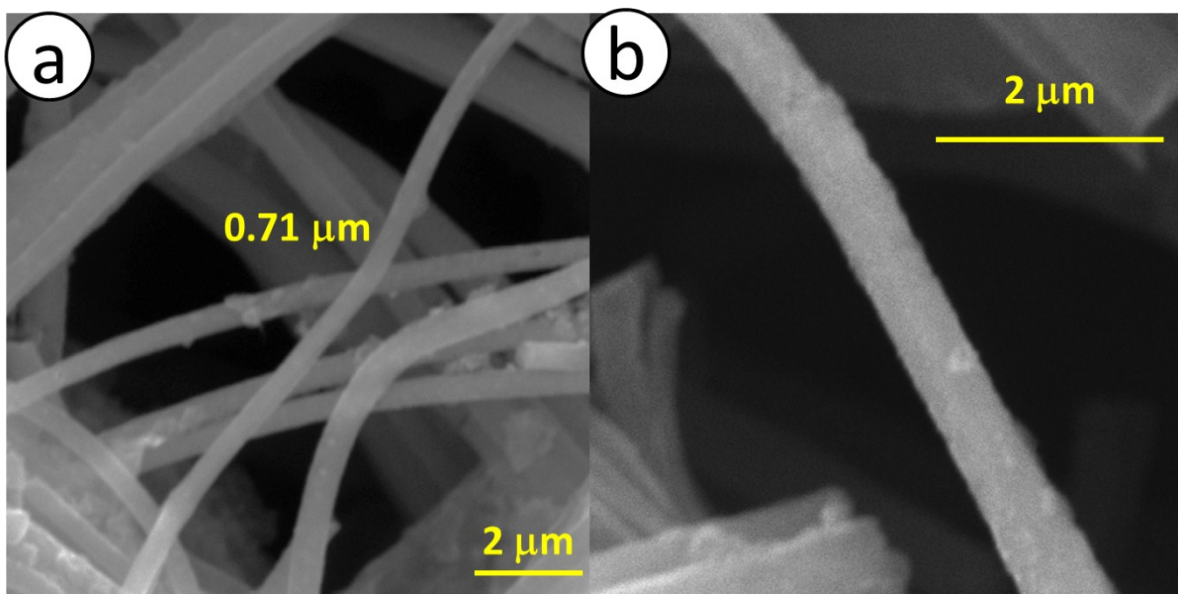

**Figure S13:** Post OER SEM images (a and b) of Co-ZIF-550-N<sub>2</sub> at different places.

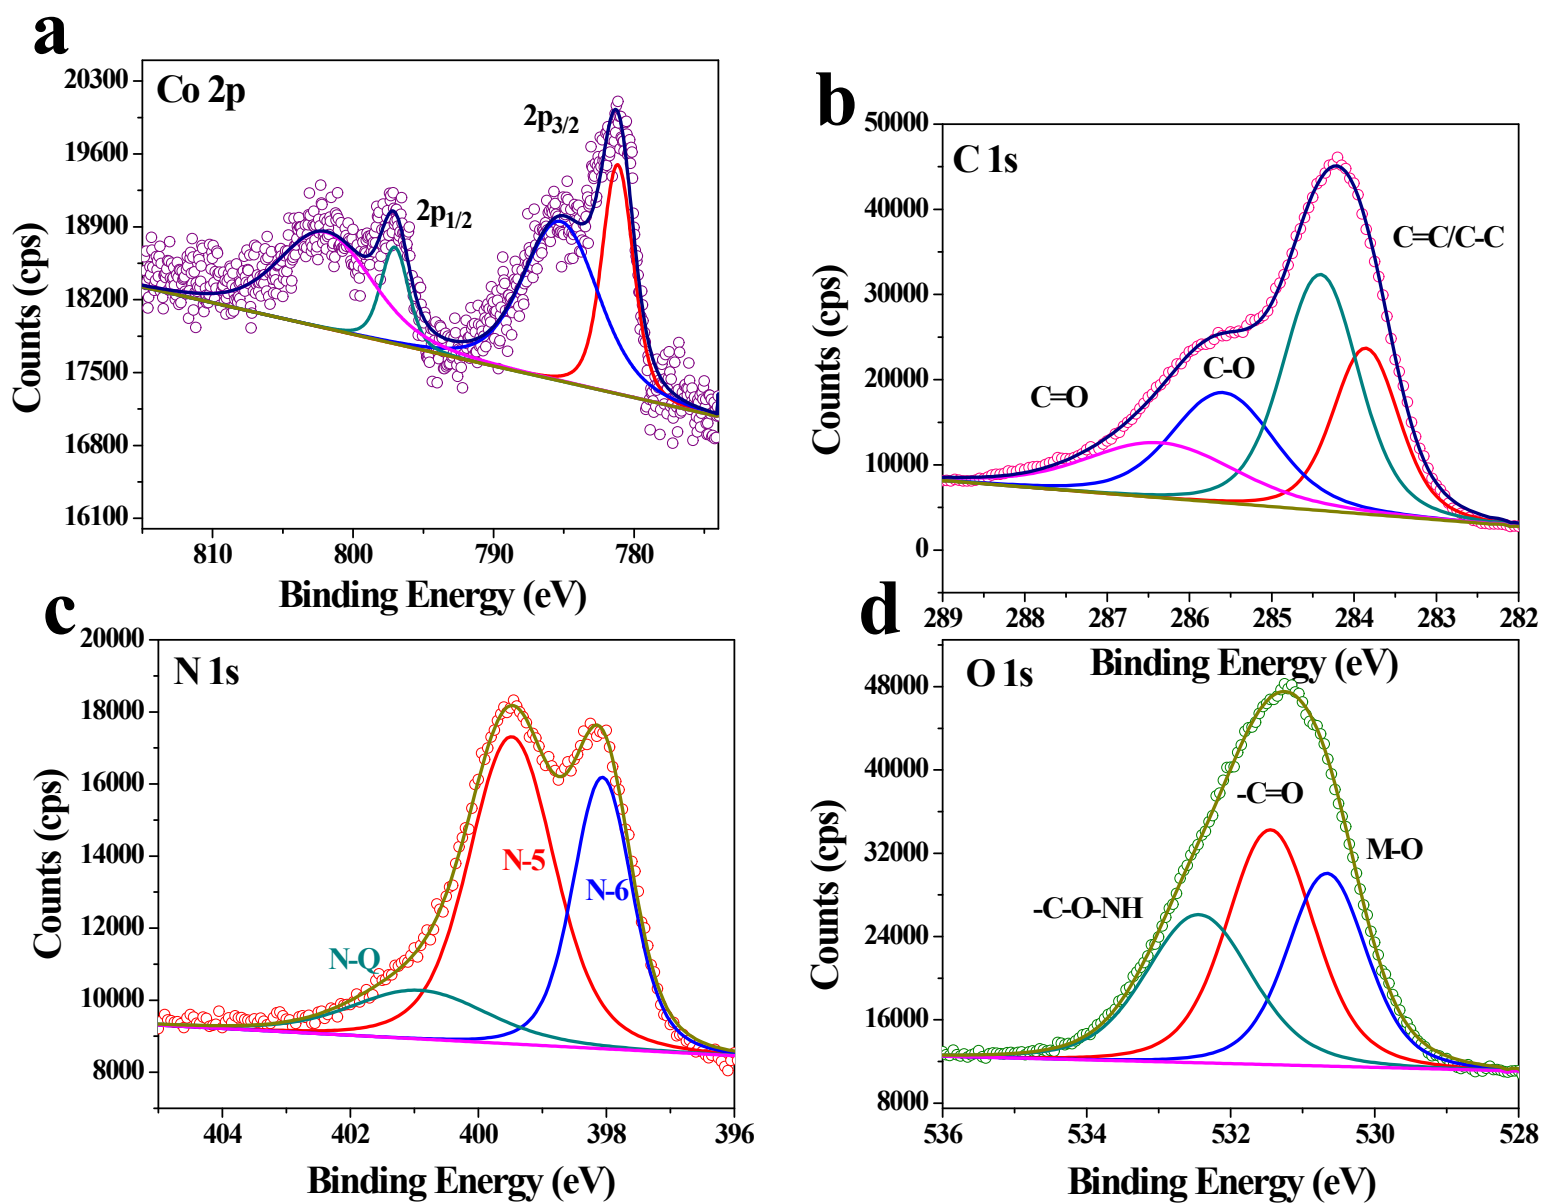

**Figure S14:** (a-d) are the post OER XPS spectrum of corresponding elements of Co 2p, C 1s, N1s and O 1s in Co-ZIF-550-N<sub>2</sub> in 0.5 M H<sub>2</sub>SO<sub>4</sub> respectively.

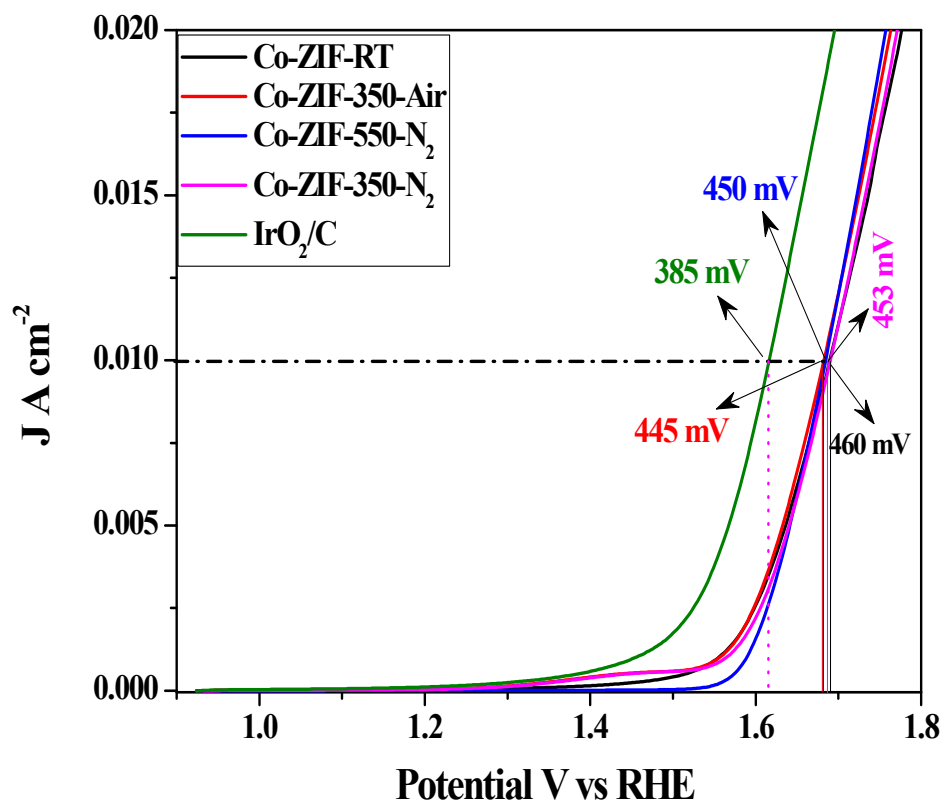

**Figure S15:** Polarization curves acquired in 1 M KOH without iR compensation.

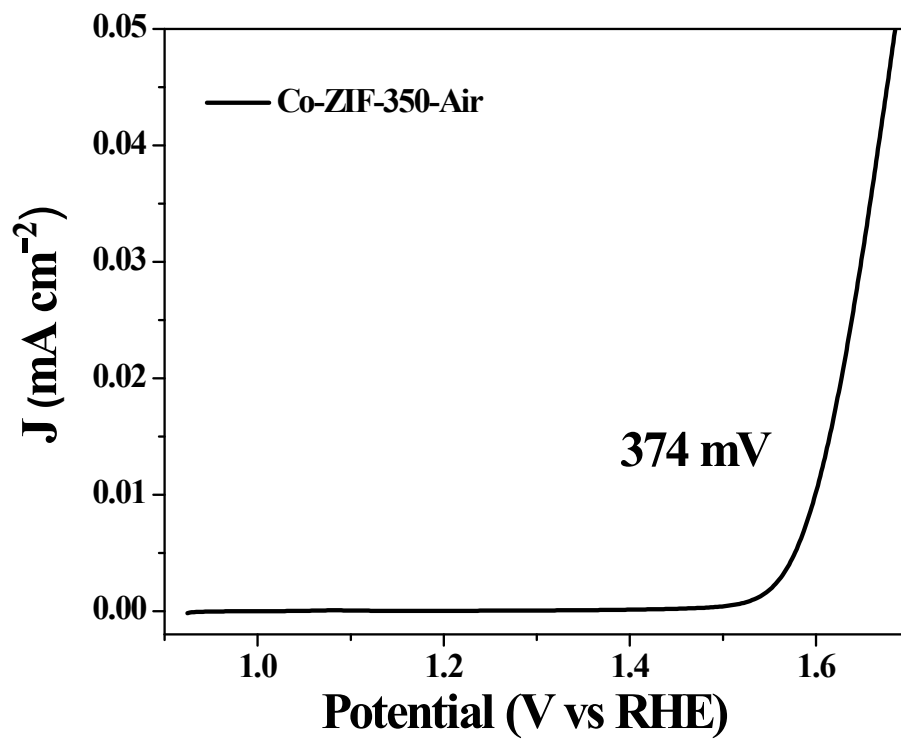

**Figure S16:** Polarization curve acquired at 1 mV/sec for Co-ZIF-350-Air after the cycling test for 500 cycles at 200 mV/sec.

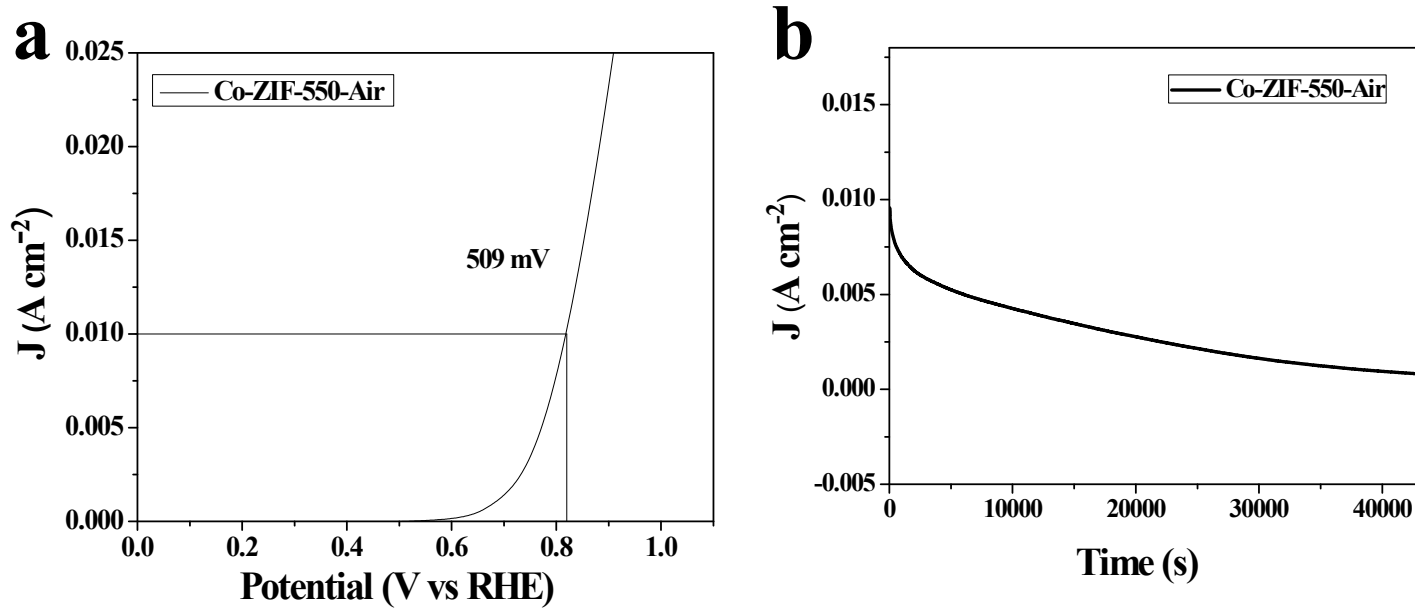

**Figure S17:** (a) is the polarization curve acquired at 1 mV/sec for Co-ZIF-550-Air and (b) is the corresponding chronoamperometry study.

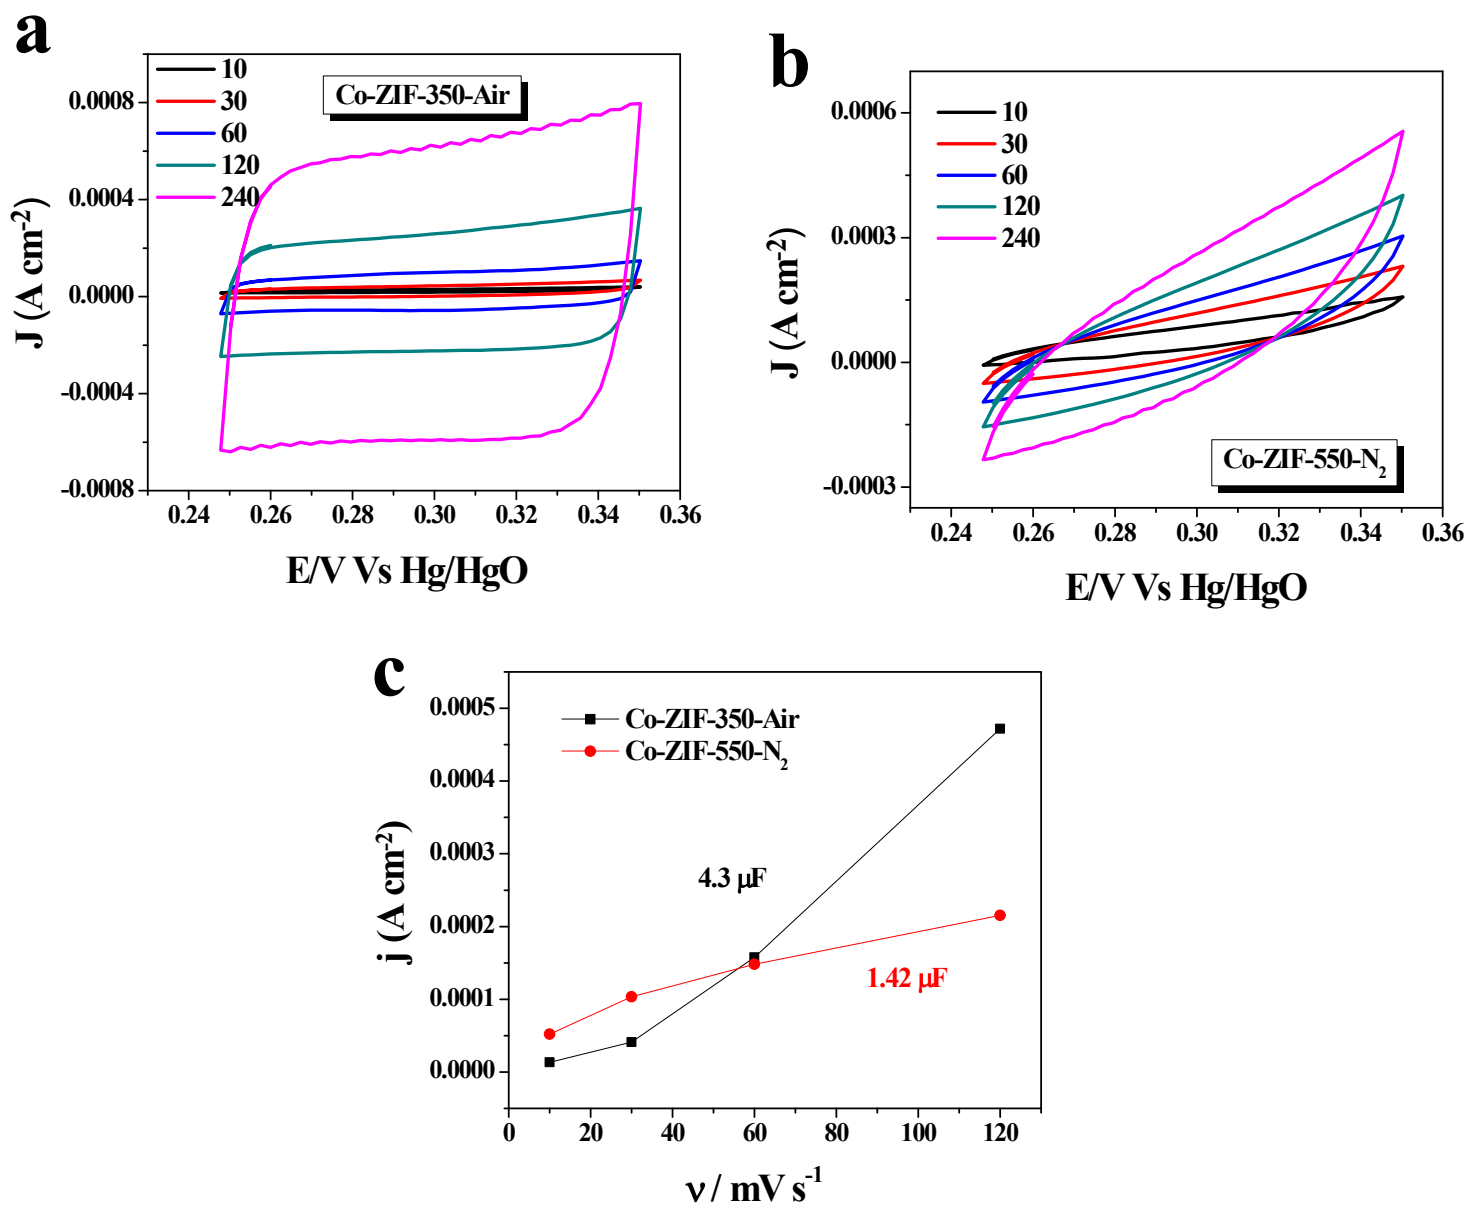

**Figure S18:** (a and b) are the observed CV at different scan rates like 10, 30, 60 and 120  $\text{mV sec}^{-1}$  and (c) is the corresponding  $C_{dl}$  values at alkaline medium.

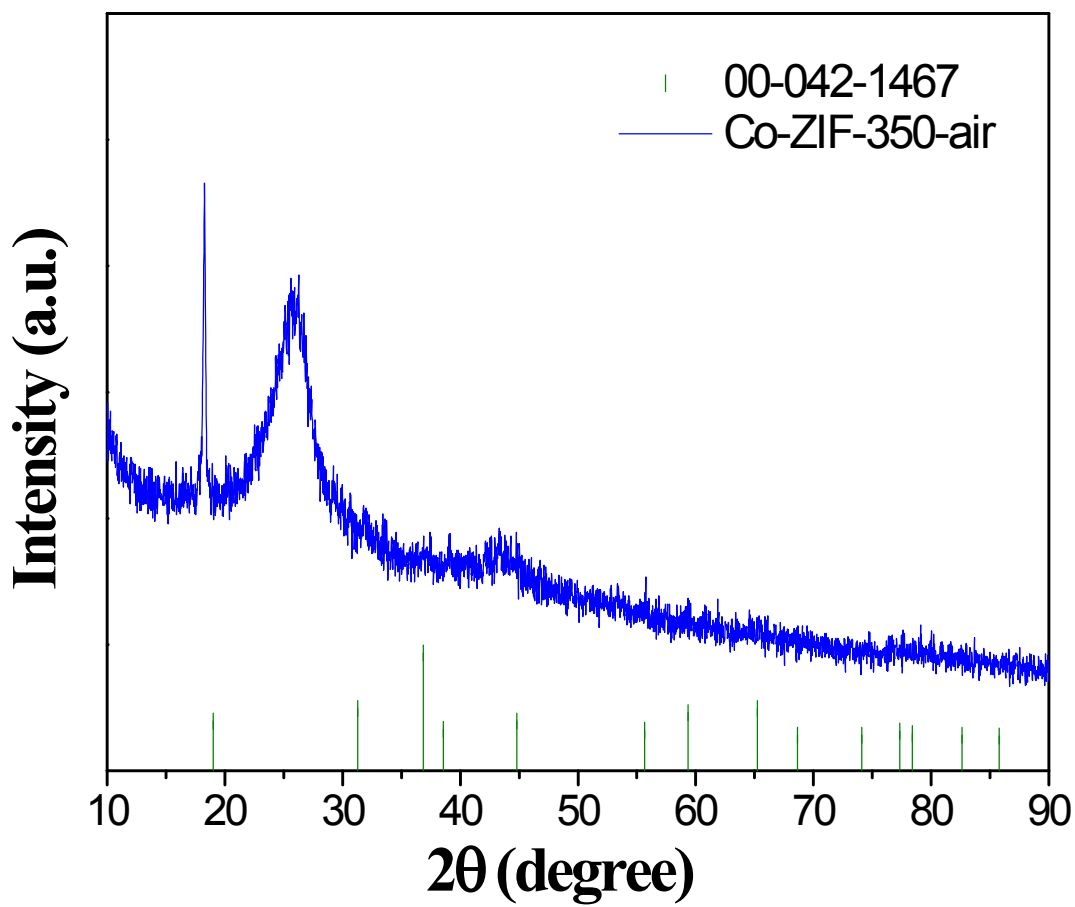

**Figure S19:** a) is the XRD pattern of Co-ZIF-350-Air observed after OER study in 1 M KOH.

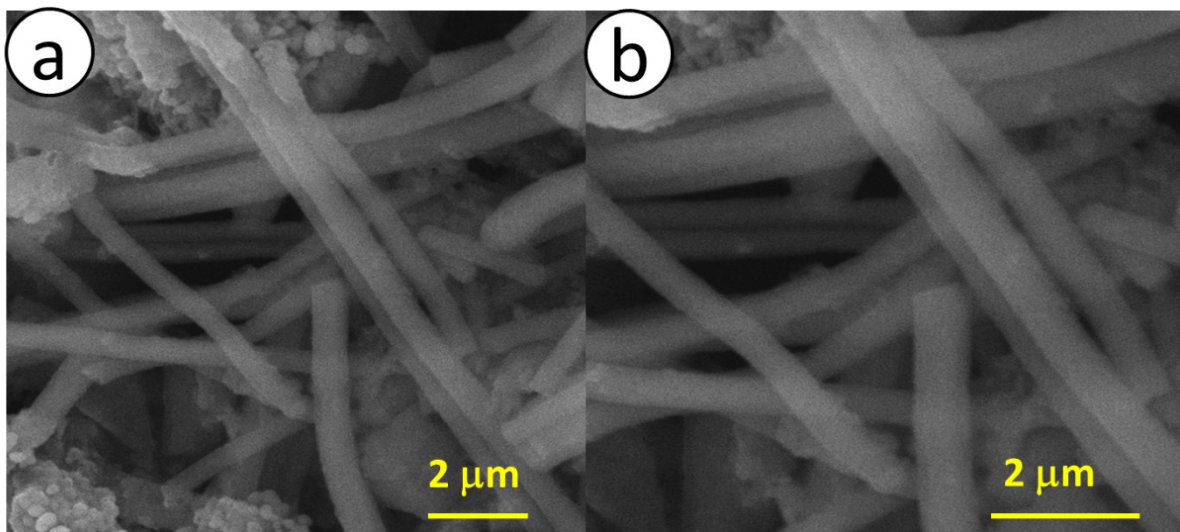

**Figure S20:** Post OER SEM images (a and b) of the Co-ZIF-350-Air at different places.



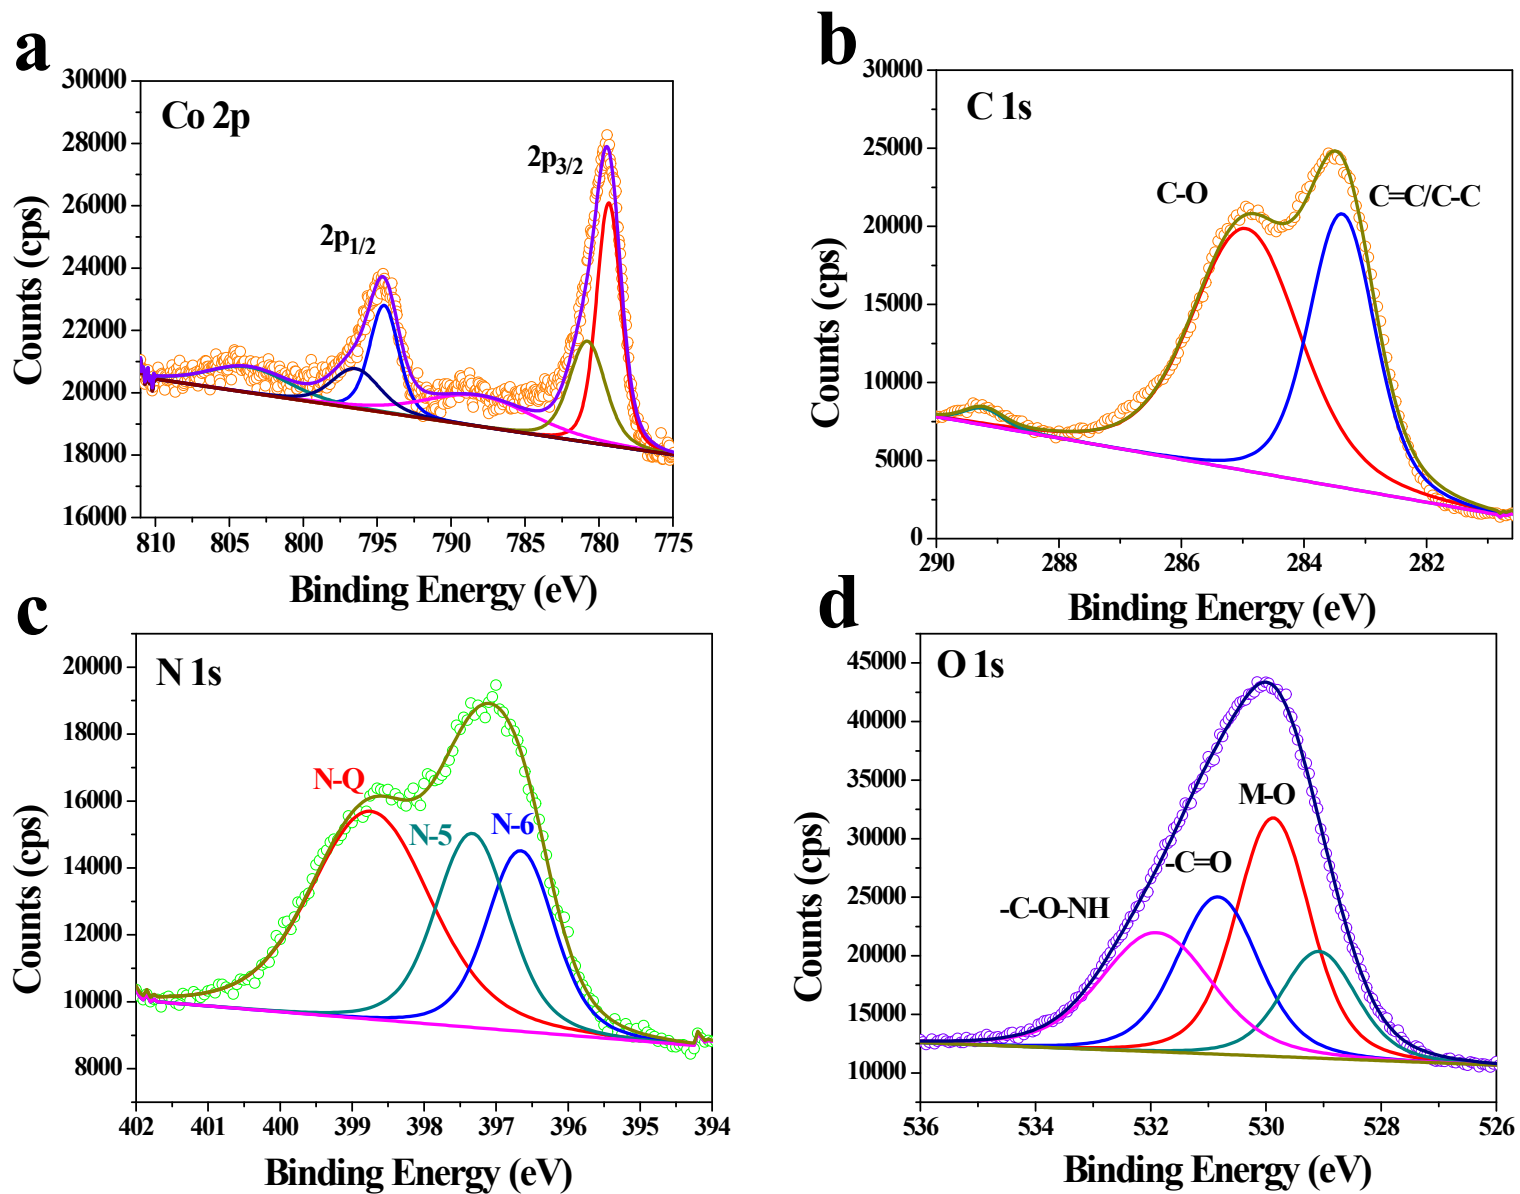

**Figure S21:** (a-d) are the post OER XPS spectrum of corresponding elements of Co 2p, C 1s, N 1s and O 1s in Co-ZIF-350-Air in 1 M KOH respectively.
